1 **Lessons learned from operationalizing the integration of nutrition-specific and nutrition-**  
2 **sensitive interventions in rural Ethiopia**

3 Girmay Ayana Mersha<sup>1,2\*</sup>, Eshetu Zerihun Tariku<sup>2,3</sup>, Wanzahun Godana Boynito<sup>2,3</sup>, Meseret  
4 Woldeyohannes<sup>1</sup>, Birhanu Wodajo<sup>1</sup>, Tadese Kebebe<sup>1</sup>, Stefaan De Henauw<sup>2</sup>, Souheila  
5 Abbeddou<sup>2</sup>

6 <sup>1</sup>Food Science and Nutrition Research Directorate, Ethiopian Public Health Institute, Ethiopia.

7 <sup>2</sup>Public Health Nutrition, Department of Public Health and Primary Care, Ghent University,  
8 Belgium.

9 <sup>3</sup>School of Public Health, Arba Minch University, Arba Minch, Ethiopia

10 \*Corresponding author: [GirmayAyana.Mersha@UGent.be](mailto:GirmayAyana.Mersha@UGent.be)

11

## 12 Abstract

### 13 Background

14 Undernutrition reduction requires coordinated efforts across sectors to address its causes. A  
15 multisectoral approach is important in diagnosing the problem and identifying solutions that  
16 would be implemented across different sectors.

17 The study aims to explore the experience of health and agriculture extension workers in  
18 integrating nutrition services provided to households with children under two years of age at  
19 community level.

### 20 Methods

21 A qualitative study has been conducted in agrarian areas of Ethiopia in 2021 at the end of a  
22 large intervention program to reduce stunting. In total, 28 key informant interviews were  
23 conducted with health- and agriculture-extension workers and mothers. A framework analysis  
24 approach was applied to manage and analyze data using NVivo version 12 software.

### 25 Results

26 Community-level joint intervention is a feasible approach to integrating nutrition services.  
27 Farm gardening and cooking demonstrations were practiced jointly with extension workers and  
28 households. Because of service integration, extension workers perceived an improved father's  
29 role in supporting mothers in childcaring and feeding nutritious diets to children, and decreased  
30 severe cases of undernutrition. Integration of health and agriculture sectors for nutrition  
31 intervention was challenged by the high workload on extension workers, poor supervision and  
32 leadership commitment, lack of appropriate agricultural inputs, and absence of clarity on sector-  
33 specific roles. In some areas nutrition services are not owned by the health and agriculture  
34 sectors, and it was overlooked.

35 Conclusion

36 Integrating existing community-level platforms are key entry points to address undernutrition  
37 and promote key agriculture and health interventions in Ethiopia. Empowering extension  
38 workers through training, monitoring, and supervision is part of ensuring the sustainability of  
39 integration between sectors.

40 **Keywords:** Community health, agriculture, multisectoral, nutrition, Ethiopia

## 42 Introduction

43 Undernutrition including stunting, wasting, underweight and micronutrient deficiencies  
44 plagued populations in low- and middle-income countries for decades and remains one of the  
45 most pressing health problems. Young children and women of reproductive age are particularly  
46 vulnerable because of their increased nutrient requirements, and, in case of women, their lower  
47 social status, which limits their access to nutrient-rich foods [1]. The causes of undernutrition  
48 are complex and affected by factors acting at different causal hierarchical levels [2]. The  
49 political, economy, health, education, agriculture and food systems, water and sanitation, and  
50 the environment are all determinants of maternal and child nutrition and health [3].  
51 Undernutrition reduction requires coordinated efforts across sectors to address its underlying  
52 causes [4, 5]. Addressing the problem of undernutrition needs the collaboration of multiple  
53 sectors and a variety of stakeholders in governments, non-government organizations, and the  
54 private sector [6]. Undernutrition reduction requires a departure from a health system-centered  
55 approach of provision of nutritional services and nutrition-specific interventions only, to an  
56 integrated approach that encompasses nutrition-sensitive, food systems-based approaches[7].  
57 The framework of actions proposed by the UNICEF and the Lancet nutrition series recognizes  
58 the needs for multiple actions that are at different levels from immediate, underlying to distal  
59 [2, 8]. Interventions targeting the improvement of maternal and child nutrition and health act  
60 on interlinked factors which influence each other. Nutrition-specific interventions address the  
61 immediate causes of undernutrition and nutrition-sensitive interventions focus on the  
62 underlying causes of good nutrition [9]. Both nutrition-sensitive and specific interventions  
63 require an enabling environment, that encompasses actions addressing basic determinants of  
64 undernutrition. Multiple actions to improve nutrition were undertaken over the recent years, the  
65 most prominent is Scaling Up Nutrition which clearly underscores the necessity of actions

66 among all the stakeholders [10]. This approach puts nutrition at the core of each sector plan and  
67 institutional effort.

68 However, systematic coordination between different sectors to achieve the objectives of  
69 improved maternal and child nutrition is problematic, given the bureaucratic barriers that  
70 characterize the administrative division of responsibilities among sectors. All sectors are  
71 expected to be clear about what they can contribute to resolving malnutrition in a particular  
72 context specific to their sector role. Agriculture, as an example of nutrition-sensitive  
73 intervention, can potentially increase food availability, which would directly improve the  
74 dietary accessibility leading to improved nutritional status of targeted populations. However, the  
75 multiple factors that influence nutrition, the social dynamics within households that can result  
76 in unexpected allocations of resources, and the many indirect ways that agriculture may impact  
77 nutrition, require purposeful planning and careful consideration of how exactly program inputs  
78 will lead to nutritional improvements. This complex relationships has consequently lead to  
79 limited impact of nutrition intervention, because other determinants are not put in place at  
80 different levels.

81 Ethiopia is one of the countries with the highest rate of undernutrition in sub-Saharan Africa.  
82 The proportions of stunting, underweight and wasting among children under age of five years  
83 are respectively 38%, 24% and 10% in Ethiopia [11]. Multiple efforts have been made to  
84 implement the government commitment towards ending undernutrition. To reach this goal,  
85 Ethiopia has demonstrated a strong policy commitment to nutrition through the development of  
86 a multisectoral food and nutrition policy, which highlights the need to accelerate multi-sectoral  
87 approaches [12]. Political willingness is an important factor that helps to implement effective  
88 nutrition interventions [10]. However, the Ethiopian situation remains in its debuts with poorly  
89 synchronized sectors of food, nutrition, agriculture, and health to prevent the problem of under-  
90 nutrition. In Ethiopia, the presence of health and agriculture extension systems and frontline

91 workers at the community level is a good framework that facilitates the synergetic linkage of  
92 nutrition within health and agriculture services [13] Additionally, existing multisectoral  
93 nutrition coordination structure at all levels, and the willingness of international and national  
94 development partners to support multisectoral nutrition interventions are favorable conditions  
95 on the ground [14]. Ethiopia has implemented multiple nutrition-specific and nutrition-sensitive  
96 programs such as the Ethiopian national nutrition program, and the Seqota declaration program,  
97 that have required the development of structures and processes that facilitate multisectoral  
98 coordination [15]. But, collaborations between the health and agriculture sectors are suboptimal  
99 at community levels [16]. The multi-sectoral nutrition programs and interventions lack strong  
100 coordination that brings on board all the relevant stakeholders.

101 Based on these facts, Ethiopia designed different intervention modalities whose objective is to  
102 strengthen community-level multisectoral nutrition interventions. In this context, the  
103 Sustainable Undernutrition Reduction program in Ethiopia (SURE) was developed and  
104 implemented between 2016 and 2020 in rural regions of Ethiopia. The program utilizes the  
105 potentials of the Agricultural Development Agents (DAs) and the Health Extension Workers  
106 (HEWs) for the promotion of improved agricultural practices and utilization of high nutrient  
107 products to promote dietary diversification among rural mothers and children. At present, there  
108 is no study that has analyzed the experience and perception of the health (HEWs) and  
109 agriculture extension workers (AEWs) in integrating nutrition services provision at the  
110 community level in rural Ethiopia. Understanding frontline workers' practices and experience  
111 is crucial for identifying appropriate measures to sustain nutrition improvements [9]. This  
112 qualitative study aims at appraising the understanding, the knowledge and perception of those  
113 women and men who are the most in contact with the communities in rural Ethiopia and who  
114 were responsible to implement the SURE program.

## 115 Methods

### 116 Study Setting

117 The Ethiopian Ministry of Health and the Ministry of Agriculture led the implementation of the  
118 SURE program whose aim was to reduce stunting by improving complementary feeding  
119 practices and dietary diversity of young children through a process of improving local  
120 agricultural productivity, food accessibility, food consumption diversity and nutritional status  
121 of young children and women [27]. SURE, was implemented between 2016 and 2020 in four  
122 agrarian regions (Oromia, Amhara, Southern Nations, Nationalities, and Peoples' Region  
123 [SNNPR], and Tigray). The program package included promoting diversified agriculture,  
124 promoting infant and young child feeding (IYCF) practices, empowering women's decision-  
125 making related to agriculture, diversified food intake, and health, and enhancing food security  
126 and water, sanitation, and hygiene practices (WASH). The SURE intervention districts were  
127 selected because of the high food insecurity and stunting prevalence in four regions out of the  
128 nine total regions in Ethiopia. Details of the SURE intervention program have been published  
129 elsewhere [17].

130 Briefly, a total of 36 districts (Woreda as locally called) were selected and assigned to the SURE  
131 intervention. Comparison control districts were selected in equal number (36 districts) in the  
132 same four agrarian regional strata as for intervention districts. Districts were roughly matched  
133 based on stunting prevalence tertiles (low, medium or high) and food insecurity scores. Eligible  
134 households are households with at least one child under the age of 2 years. The intervention  
135 started in 2016 and included 4299 households, 2146 households from 144 Kebeles (smallest  
136 administrative unit) were included in the intervention group and 2153 from 144 Kebeles in the  
137 control group. After baseline data collection, and all households received counselling at  
138 household and community levels. Additionally, 10 % of households with children aged under

139 two years in the intervention regions (they can be enrolled or not in the larger SURE  
140 intervention) were 1) provided improved seed variety and chicken through AEWs and 2) trained  
141 through demonstration gardens at farmer training centers.

142 The SURE program was delivered through: 1) interpersonal contacts to provide counselling on  
143 IYCF and nutrition-sensitive agriculture advice to mothers and fathers of children under 24  
144 months, inclusive of pregnant women and fathers-to-be, jointly delivered by the local HEWs  
145 and AEWs during routine household visits; 2) men's and women's group dialogues targeting  
146 all men and all women in a given community network, facilitated also by the local HEWs and  
147 AEWs, and 3) media campaign to reinforce IYCF and dietary diversity messages.

#### 148 [Study design](#)

149 A phenomenological qualitative study design was conducted among beneficiaries (mothers)  
150 and implementers (HEWs and AEWs) of the SURE program in the intervention communities.  
151 One Kebele per district from the intervention group was randomly selected to contribute in the  
152 qualitative study.

#### 153 [Study period](#)

154 This qualitative study was conducted after four years of intervention. The data were collected  
155 at the community level in selected districts of Amhara, Oromia, and SNNPR between January  
156 and February 2021. Data collection was discontinued in Tigray because of the war.

#### 157 [Recruitment of participants](#)

158 All SURE intervention districts and Kebeles in the three agrarian regions of Ethiopia were  
159 eligible for inclusion. The recruitment of participants was done purposely to obtain maximum  
160 variation of information. The HEWs and AEWs as service providers of the intervention  
161 packages, and mothers who were enrolled in the SURE intervention as direct beneficiaries were



162 invited to participate in this study. The HEWs and AEWs were eligible to participate in this  
163 study if they received the SURE program training in 2016 and have provided the service as per  
164 their training in their respective Kebele for a minimum of two years. Mothers should be  
165 residents of the Kebele, would have had a child 0-24 months old at the time the intervention  
166 started, and received joint health and agriculture counseling as described in the study setting.

#### 167 [Data collection and tools](#)

168 Data were collected using key informant interviews (KIIs) at the community level from a total  
169 of 28 eligible respondents including HEWs, AEWs and mothers. Participants were asked about  
170 their understanding of nutrition, quality of service provided and quality of nutrition education  
171 specific to the SURE program, the challenges of implementing nutrition programs jointly, and  
172 how the program could be sustained for a better nutrition service provision (Supplementary  
173 material 1).

174 Participants took part in a face-to-face interview. A topic guide was developed by the research  
175 team and training on how to conduct KIIs was provided. The interview began with demographic  
176 questions about schooling, experience, and professional background. All the interviews were  
177 conducted in a private space and were audio recorded. Data was collected in the local languages  
178 (Amharic and Oromifa). Audio recordings were transcribed and translated into English. All  
179 transcribed data was anonymized.

#### 180 [Data Analysis:](#)

181 A framework analysis approach was used to manage and analyze the data. Framework approach  
182 provides clear steps to follow and produces structured outputs of summarized data that can be  
183 used with a variety of data sources, including interviews, focus groups, and documents [18].  
184 The steps include familiarization (becoming familiar with the content of the data), Identification  
185 of thematic areas (identifying a thematic framework, which is a set of predetermined themes or

186 categories that are relevant to the research question), Indexing (systematically coding the data  
187 to identify content related to each theme or category), and Interpretation (identifying patterns  
188 and relationships across the data, and interpreting what these patterns and relationships mean  
189 in relation to the research question). Qualitative data analysis software NVIVO version 12  
190 software was used in coding and constructing thematic areas from the collected data. The  
191 transcripts were coded into specific themes. The themes were identified and coded based on the  
192 topic guide as nutrition understanding, achievements, opportunities, and way forwards for a  
193 successful implementation of nutrition-specific and nutrition-sensitive programs and  
194 sustainability.

#### 195 Ethical considerations:

196 Ethical approval was obtained from the research ethic committees both at the University  
197 Hospital of Ghent, Belgium (protocol number BC-08862), and the Ethiopian Public Health  
198 Institute, Ethiopia (protocol number EPHI-IRB-306-2020). The qualitative study included  
199 recipients from the same cohort (participating mothers from the intervention group), in addition  
200 to health extension workers from the intervention Kebeles. Written informed consents, which  
201 included permission to be recorded using a digital audio recorder, were obtained from  
202 participants before interviews. Further administrative permissions were granted by local  
203 government bureaus in all regions.

## 204 Results

### 205 Demographic characteristics of study participants

206 From the total of twenty-eight key informants who participated in the study, 43%, 39% and  
207 18% were from Oromia, Amhara and SNNPR regions, respectively. The proportion of HEWs,  
208 AEWs and mothers were almost similar. Totally 58 % of the extension workers were female

209 and 73% had at least five years of work experience. Sixty-seven percent of the study participants  
210 have completed college and above.

211 Table 1: Demographic characteristics of the qualitative study participants, Ethiopia

| <b>Demographic Characteristic(N=28)</b>                    | <b>Frequency (%)</b> |
|------------------------------------------------------------|----------------------|
| <b>Age of participants (in years)</b>                      |                      |
| 20-30                                                      | 16 (57.1)            |
| 31-40                                                      | 10 (35.7)            |
| 41-50                                                      | 2 (7.1)              |
| <b>Region</b>                                              |                      |
| Amhara                                                     | 11 (39.3)            |
| Oromia                                                     | 12 (42.9)            |
| SNNPR                                                      | 5 (17.9)             |
| <b>Role</b>                                                |                      |
| Agriculture extension worker                               | 9 (32.1)             |
| Health extension worker                                    | 10 (35.1)            |
| Mother                                                     | 9 (32.1)             |
| <b>Sex of participants</b>                                 |                      |
| Female                                                     | 20 (71.4)            |
| Male                                                       | 8 (28.6)             |
| <b>Health and agriculture extension workers experience</b> |                      |
| 2-4 years                                                  | 5 (26.3)             |
| 5-10 years                                                 | 7 (36.8)             |
| >10 years                                                  | 7 (36.8)             |
| <b>Education status of participants</b>                    |                      |

---

|                              |           |
|------------------------------|-----------|
| No formal education          | 3 (10.7)  |
| Primary school               | 6 (21.4)  |
| Technical/vocational college | 15 (53.6) |
| Diploma and above            | 4 (14.3)  |

---

212

### 213 Major causes of undernutrition

214 The causes of undernutrition are seasonal and context-specific. The key informants perceived  
215 that, in their community, undernutrition was due to a shortage of land to produce adequate food  
216 to sell or to consume for a rapidly growing population. The severity of the problem increases  
217 when it is coupled with poor distribution of agricultural supplies, and pest infestation that affect  
218 productivity.

219 *Absence of enough farmland is the cause of undernutrition. Since the community is large in*  
220 *number, farmland is not enough. on average the farmland owned by the farmers is about 0.375*  
221 *up to 0.5 hectare. AEW,SNNPR.*

222 The problem of land and water scarcity were identified as the main cause of undernutrition in  
223 the community in Oromia region. The small plot of land is challenged by a shortage of water  
224 and agricultural inputs.

225 *The lack of adequate farming place also another problem because it is difficult to produce*  
226 *enough food for family consumption using one farming place and leads to poverty. Moreover,*  
227 *lack of adequate rain, lack of irrigation service, and the fertilizer supply is not as required in*  
228 *our kebele, which may lead to poverty. HEW, Oromia.*

229 Access to fruits and vegetables is important to improve food security and undernutrition  
230 reduction. Frequent drought and absence of irrigation facilities to farm during the dry season

231 are among the causes of undernutrition that undermine the efforts of AEWs and households to  
232 improve food and nutrition interventions.

233 *Malnutrition is mainly due to insufficient production of fruits and vegetables due to drought in*  
234 *this area. When the husbands and wives agree to produce in their home garden, it will vanish,*  
235 *because there is no irrigation. Due to this reason our community failed to produce fruits and*  
236 *vegetables and give less emphasis. HEW, Oromia.*

237 War and civil unrest affect access to- and availability of foods through destructing market  
238 linkage. Instability compromises the support of HEWS and AEWs to the community. An  
239 extension worker indicated that the causes of undernutrition are related to lack of hygiene and  
240 sanitation, diseases and infections, inflation and war that displaced people from their residential  
241 areas and hindered them from producing food.

242 *The cause of under nutrition are lack of hygiene, disease, war, and such things are the cause of*  
243 *under nutrition in addition to the above, there are food security issues. For instance, there is a*  
244 *lack of milk for children, they can't access enough milk. There is also limited access to eggs.*  
245 *HEW, SNNPR.*

246 *Now in some places, based on market inflation, some people become incapable of buying*  
247 *something, as a result, the child may develop malnutrition. For example, when children need*  
248 *milk, they may fail to give it. As a child fails to get balanced food when they need and passed*  
249 *that time, they may go into malnutrition. Some households are economically incapable to care*  
250 *for their child, there is a household that relies on the market business for leading the family,*  
251 *such a woman gave other foods to their child before six months and leave the child at home*  
252 *because they can't stay home and breastfeed their child regularly. HEW, Oromia.*

253

## 254 Challenges of integrating health and agriculture interventions in Ethiopia

255 Many challenges have been reported by extension workers in the implementation of  
256 intersectoral interventions. High workload, conflict, shortage of agricultural inputs, limited  
257 training and poor supportive supervision and COVID-19 pandemic were the most frequently  
258 reported challenges (Figure 1).

## 259 Intervention in the midst of the war in Ethiopia

260 Ethiopia is facing civil unrest in the last four years and the project intervention has been  
261 affected. Conflict was a challenge of service delivery at community level, which resulted in  
262 destruction of facilities, damages of means, and loss of income by restricting people's  
263 movement and targeted attacks on workers.

264 *The current situation is overly sensitive. It is now three years since the conflict began. Every*  
265 *day there are riots, there is something. So, people think it is turning to something else. At the*  
266 *beginning of the SURE program, the expert was there to support them every day, and the people*  
267 *were getting education and had been given training. It was good to take care of that and*  
268 *practice. But now people are abandoning everything and entering politics. "Who will die today?*  
269 *Who will live today?" They are living in fear. In this regard, political stability is a bit difficult.*  
270 *AEW, SNNPR.*

271 Conflict and the COVID pandemic have also compromised the supportive supervision and  
272 monitoring activities by restricting people's movement from regional and zonal levels to front  
273 line workers.

274 *... So, this team has met frequently, and minutes have been kept on our discussion. This meeting*  
275 *was previously held every week, then turns to every month. As I said earlier, recently we have*  
276 *less engagement due to varied factors and we do not have minutes. We fail to gather the*  
277 *participants to give different training as this contradicts the covid-19 restrictive measures.*  
278 *HEW, Oromia.*

## 279 Shortage of agricultural inputs and material for workshop training

280 The availability of agricultural inputs for gardening and cooking demonstrations at community  
281 level was a challenge and participants were not interested in bringing their own food and  
282 material for demonstration. The project gives agricultural inputs to only 10% of the total  
283 population, but the demand for agriculture inputs was high and the community perceived that  
284 the project does not treat people equally.

285 *We are very much interested in the work (for example a demonstration of food preparation).*  
286 *For this demonstration, if you asked the farmers to bring the ingredients/inputs (like egg, kale,*  
287 *cereals, ...) from their home they will lose their interest. It is difficult to bring by yourself too.*  
288 *The issue is the problem of access to input for the demonstration. AEW, Oromia.*

## 289 Workload and ownership of the program

290 Nutrition activities are not a priority agenda in all sectors equally. The ownership of nutrition  
291 is not clearly defined, and extension experts assume an additional assignment is beyond their  
292 regular tasks. There is a lack of awareness and commitment by AEWs to implement nutrition  
293 activities at a community level. AEWs assume that tackling issues related to women's and  
294 children's nutrition to be the role of HEWs.

295 *Emm... there is often a seasonal job. For example, in the health sector, they will have activities*  
296 *such as the vaccination campaign, as well as in the agriculture sector, such as spring, harvest,*  
297 *watershed and irrigation. We do not keep our appointment because we give priority to our main*  
298 *work. Especially in health, there are increased immunization programs, increased follow up*  
299 *programs. AEW, SNNPR.*

300 Integrating agriculture and health services is challenged by shortage of workforce. Food and  
301 nutrition-related interventions are not a priority for the agriculture sector. The leadership does  
302 not prioritize nutrition, and they always focus on campaigns that aim to achieve a sector-specific  
303 activity like vaccination in the health sector and water shedding and plantation in the agriculture

304 sector. Extension workers assume that nutrition activities require additional experts assigned to  
305 the job. The service was also compromised by the absence of continuous monitoring and  
306 evaluation mechanisms.

307 *The main reason was being overburdened or having overlapping duties on our side. The*  
308 *agricultural extension workers push these SURE program activities on us, by mentioning that it*  
309 *is not their duty. We also mentioned that these SURE program duties are their responsibility.*  
310 *Both sectors push the duties to each other because of work overload. Therefore, we emphasize*  
311 *only a single duty expected from our major career and letting others perform the SURE duties.*  
312 *We met and discussed the issues only when stakeholders from the zone came to our kebele for*  
313 *supervision, otherwise, it was overlooked by both of us. No one continuously monitors the*  
314 *progress as result, it will be forgotten. If this is not the case, we would perform it successfully*  
315 *in collaboration with AEW. HEW, Oromia.*

#### 316 [Absence of adequate training, supervision, and technical support](#)

317 Supportive supervision and technical support during the implementation of new program is a  
318 key factor for the success of a project. The SURE program was designed in a way that  
319 supervisors contribute continuously during the whole implementation period. The support  
320 provided during the program implementation was limited and many extension workers  
321 perceived the support and supervision provided were not adequate.

322 *Let alone frequent training, if at least the concerned bodies at zone level visit our activities and*  
323 *provide the necessary feedback, it will motivate us for further improvement. It is pretty good if*  
324 *those in the zone were actively involved. As said earlier there is no problem at kebele level but*  
325 *at zone level, it seems an overlooked opportunity. HEW, Oromia.*

326 *When the support is provided in an interrupted way, the community perceives the*  
327 *activities/supports are useless. If the support comes in an organized manner and reaches the*  
328 *kebele (for the farmers) hierarchically, the farmers did not oppose it. They will curiously take*



329 *the supports and adapt to their home/household. But, if the support seems loose from its origin,*  
330 *the community considers it useless. AEW, Oromia.*

### 331 Lesson learned and sustainability of health and agriculture intersectoral intervention

332 The SURE intervention packages depended on multi sectoral coordination at the local and  
333 district levels (Figure 1). However most agricultural interventions were perceived as the  
334 distribution of poultry and other agricultural materials. Although most extension workers  
335 captured the intention of the target population, as being mothers, young children and those who  
336 are most vulnerable households.

337 *SURE, program covered mainly hen distribution for targeted population segments. For*  
338 *example, the program distributed up to 6 hens per household. Especially for the lowest quantiles*  
339 *of fathers and mothers [socioeconomic], lactating mothers, and children less than 2 years of*  
340 *age. SURE, also supplies seed for vegetables. Training is also given for both the professional*  
341 *and community. AEW, Amhara.*

342 *In the beginning, we provided training. After we took 15 days of training at the start of the*  
343 *program, we mainstreamed this to the level of community. Then, in all kebeles, chicken (for egg*  
344 *production) was purchased and provided for 20 individuals per kebele. Different productive*  
345 *agricultural materials like water pumps and others were given to support them in the production*  
346 *of fruits and vegetables in their backyard. AEW, Oromia.*

347 Health and agriculture extension workers jointly visited households with under two years of  
348 age children and provided age-appropriate IYCF counselling and advice on nutrition-sensitive  
349 agriculture to improve dietary diversity. Job aids have been developed with food calendars and  
350 recipe books for each region. Extension workers describe their experience of joint visit as  
351 follows:

352 *we are working together on SURE program. The kebele has a man's and women's development team*  
353 *[community-level volunteers who provide support to health and agriculture extension workers in*

354 mobilizing communities to deliver service]. *We and the health extension staff are going from house*  
355 *to house and teaching them how to feed their families, especially pregnant mothers, and children*  
356 *under two years of age, how to grow vegetables and animals on their limited land and use them at*  
357 *home without taking them to market. When we teach together, we or the agriculture extension*  
358 *workers through the men's development team, teach them how to produce, what to sow, how to care*  
359 *for and feed their children together, how to feed nutritious food and how to feed at least six different*  
360 *types of food. The health extension worker shows them cooking demonstration. For example, they*  
361 *teach them what to mix, how to prepare and how often to feed. AEW, SNNPR.*

362 *We gather women twice a month in their group to provide training. We have materials and different*  
363 *food items on our demonstration site, we show them how to prepare and feed soft foods like porridge*  
364 *for children. We advise women to prepare food available in the home based on their capacity. For*  
365 *instance, they sell eggs and buy cabbage, we advise them to avoid this habit and spend time feeding*  
366 *the child. HEW, Oromia.*

367 Mothers witnessed the service received by extension workers in their community. Although,  
368 asking mothers to come with food ingredients could be one factor that limits mothers from  
369 attending cooking demonstration sessions.

370 *From HEW I have heard about the preparation of porridge from food items available at home like*  
371 *cereals (bean, chickpea and pea), seeds (teff, wheat, oats, millet and barley) vegetables and animal*  
372 *products (meat, egg, milk etc). I have also learnt about feeding the children only breast milk until*  
373 *the age of six months. .... From the AEW, I have learnt about chicken for baby and garden for baby.*  
374 *They taught us, as we must have vegetables in our garden and animal products at home. If these are*  
375 *not available at home, we are expected to buy from the market and prepare porridge from these*  
376 *variety of food items to feed children. Mother, Oromia.*

377 Farm demonstration gardens were established at the farmer's training centers to facilitate  
378 coordination between the HEW managing the health posts and the AEWs working on the farms.  
379 Farm demonstration gardens were developed and managed by AEWs. Appropriate varieties of

380 vegetables were selected according to agroecology. Harvests from the farmer's training centers  
381 were used for cooking demonstrations. Cooking demonstrations were managed by HEWs at  
382 health posts near the farmer's training centers. Women also donate ingredients from their homes  
383 to contribute to the exercise.

384 *We give agricultural demonstrations on every occasion. Whenever we get the best performance, we*  
385 *give training and demonstrations on farmer's land or on farmer's training centers to act as the best*  
386 *performed farmers. We also give demonstrations as per the farmers' needs and questions. SURE,*  
387 *the program recommends demonstration every month. We give porridge demonstration for both*  
388 *women and men developmental army every month. Before a year this was done every month*  
389 *consistently. Currently we give demonstrations every 2 months or longer. AEW, Amhara.*

390 *When they advised us, they said in recent days, even not the rural, the urban communities are*  
391 *practicing home gardening with the limited land they have in the backyard. Different types of*  
392 *vegetables (tomatoes, kale, potatoes...) are on your hand; you may not need to buy them from the*  
393 *market, plant them. Mother, Oromia.*

#### 394 Knowledge gained through the SURE program

395 The SURE program interventions have impact on the knowledge of community to improve  
396 child caring practice, agricultural and behavioral practices in different parameters like severe  
397 undernutrition workload, women empowerment, and father's support. The extension workers  
398 have observed the changes in the community, mainly fathers' role in supporting mothers in  
399 childcaring and the importance given to feeding nutritious diet to children instead of selling the  
400 food produced. The extension workers felt that severe cases of undernourished children visiting  
401 health centers have decreased.

402 *...after the implementation of the SURE program, we noticed a significant decline in the*  
403 *prevalence of malnutrition. The number of children brought to our health post with malnutrition*  
404 *has significantly declined. Before the implementation of this program, we found a lot of cases*

405 *and referred them. If in case we found a child with malnutrition, it is the moderate type of*  
406 *malnutrition. The severe form of malnutrition is almost rare after the SURE program.*

407 *Concerning women empowerment, one of the most important changes SURE bring is, engaging*  
408 *husbands in food demonstration, letting husbands start to think as they are responsible for*  
409 *childcare, for their women and they also believe that women have an equal right to decide on*  
410 *their asset. The surprising thing was we as our area discuss many issues related to women,*  
411 *including their right, ability, responsibility and how they can be independent economically and*  
412 *manage their home. For instance, if she generated income by breeding chicken, she could obtain*  
413 *money on her own and incorporated it into the household after counselling and significant*  
414 *improvement have been observed. HEW, Oromia.*

415 *In the past, men thought that caring for children was a women's job. But now it has completely*  
416 *changed; men help their wives by caring for their children. AEW, SNNPR.*

#### 417 [Importance of monitoring and regular supervision](#)

418 Awareness creation activities should be organized frequently for proper implementation of  
419 nutrition interventions, and ideally by another person responsible for coordinating nutrition  
420 activities at community level. Additionally, the importance of regular meetings and evaluation  
421 for integrating services at community level was highlighted.

422 *The first is, giving awareness creation education. For this HEWs and AEWs are responsible.*  
423 *But HEWS and AEWs are busy with other tasks. Therefore, there should be other responsible*  
424 *body at kebele level for this task to reduce the work overload and to avoid task overlapping*  
425 *among HEWs and AEWs. This may increase the effectiveness of the SURE program.*

426 *The other is having regular meetings to monitor and evaluate the progress of the program.*  
427 *During this meeting, all responsible bodies should be present. The program should have a*  
428 *budget for both monitoring and evaluation as well as for supplies. The porridge and the like*  
429 *demonstration need raw materials. These materials should be funded by the SURE program.*  
430 *AEW, Amhara.*

431 *At the start of the program there was an evaluation session every six months and sometimes*  
432 *every year. Now it has totally stopped. Especially after COVID 19. There is a plan, but the*  
433 *achievement is not checked. The reason is usually lack of budget. Therefore, there should be a*  
434 *budget for the monitoring and evaluation. HEW, Oromia.*

## 435 **Discussion**

436 This study explored the experience of integrating health and agriculture sectors for improved  
437 food security and nutritional status in Ethiopia. This study reported that the major cause of  
438 undernutrition in the SURE program intervention areas are drought, conflict, and population  
439 pressure. Furthermore, the high burden of infectious diseases and WASH problems were the  
440 cause of the undernutrition. The finding is aligned with the study of Mohamed (2017) which  
441 found drought, population pressure, and conflict as the major causes of food security problems  
442 in Ethiopia, resulting in child undernutrition and household food insecurity [19]. Similarly  
443 finding on child growth in the time of drought by Hoddinott and Kinsey (2001) has shown that  
444 conflict and drought increase stunting prevalence among young children in poor households  
445 [20].

446 Nutrition interventions require intensive effort from multiple sectors. The expansion of  
447 governmental services from nutrition-specific to nutrition-sensitive strategies is the preferred  
448 approach, as it addresses all determinants of maternal and child nutrition and health including  
449 social and economic determinants [15]. Ethiopia has a national structure for multi sectoral  
450 nutrition coordination anchored at the Ministry of Health and a working model at district level  
451 also exists [14]. Nevertheless, according to this finding nutrition has been perceived as the work  
452 of the Ministry of Health and has been framed as a treatment/preventive problem, which mainly  
453 involves health sector interventions. One of the reasons to have a multisectoral nutrition policy  
454 is to lift the responsibility of improving nutrition into a national concern. SURE is one of the  
455 government-led programs that try to bring the health and agriculture sectors to work jointly for

456 improved dietary diversity and improved nutritional status [17, 21]. Integrating nutrition into  
457 the national development agenda, ensuring all sectors have a mutual understanding of the  
458 importance of undernutrition prevention, and having a mechanism that helps to ensure local  
459 delivery of nutrition services, through decentralization are key components of multisectoral  
460 response for undernutrition reduction. SURE, is a common umbrella that brings HEWs, AEWs  
461 and women to promote dietary diversity and better nutrition in Ethiopia. But we found extension  
462 workers are overloaded by different sectoral activities which can limit their joint efforts and  
463 compromise the integration of nutrition-related activities. Similar to this study, frontline  
464 workers in Uganda confront various pressures from the institutional and socio-political  
465 environment, that limit their decisions about their daily activities [9]. Pelletier and collaborators  
466 found that in sub Saharan African countries, institutional integration of nutrition in different  
467 sectors was challenged by the job description of staff, the lack of sectoral alignment on  
468 multisectoral nutrition objectives and integration into the planning and reporting of sector  
469 activities [14]. A systematic review exploring the integration of nutrition-sensitive and specific  
470 interventions in fragile environments shows a lack of interest in collaboration, workload and  
471 diverting to only sectoral activities as the barriers to integrating nutrition services [22].

472 Delivering nutrition services to the local level tends to work better in countries that have  
473 adequate decentralized structures. In Ethiopia, the vertical structure of the Ministry of Health  
474 and Ministry of Agriculture from central to Kebele level offers an opportunity to integrate  
475 nutrition services at community level. Front-line HEWs and AEWs are a critical bridge between  
476 communities and service provision systems in the health and agriculture sectors. Empowering  
477 extension workers, supporting them and responding to the challenges they face will be an  
478 important part of ensuring the sustainability of joint activities to promote proper nutrition.  
479 Therefore, appropriate training, supportive supervision and performance monitoring should be

480 in place to ensure the successful implementation of joint programs in the health and agriculture  
481 sectors.

## 482 [Strengths and limitations](#)

483 Our study collected data from actual implementers and beneficiaries of joint intervention  
484 program which can be used to scale up their experience. However, our study focused only on  
485 the health and agriculture sectors and did not explore the experiences of other sectors included  
486 in the Ethiopian national nutrition program.

## 487 [Conclusion](#)

488 Integrating existing community-level platforms are key entry points to address undernutrition  
489 and promote key agriculture and health interventions in Ethiopia. Community-based joint  
490 interventions are perceived as appropriate approaches to prevent severe cases of undernutrition  
491 and improve the role of family members in supporting mothers. Empowering extension workers  
492 through training, monitoring, and supervision, and addressing the challenges they face are part  
493 of ensuring the sustainability of integration between sectors.

494

## 495 [Author contributions](#)

496 Conceptualization – GAM, SDH, SA

497 Data curation – GAM, EZT, MW

498 Formal analysis – GAM, SA

499 Investigation – GAM, MW, EZT, MW, TK, BW

500 Methodology – GAM, SDH, SA, TK, BW, WGB

501 Project administration – GAM, SDH, SA, EZT, MW

502 Resources – SDH, SA

503 Supervision – GAM, SA, EZT, MW, TK, BW

504 Validation – GAM, SA

505 Visualization – GAM, SA

506 Writing - original draft preparation – GAM

507 Writing – review and editing – GAM, SDH, SA, EZT, MW, WGB, BW, TK

#### 508 Funding

509 This work was funded by Ethiopian public health institute and the Global Minds Fund of Ghent  
510 University <https://www.ugent.be/en/research/funding/devcoop/globalmindsfund.htm> (GRANT  
511 GMF.CAB.2020.0025.01). The funder had no role in study design, data collection and analysis,  
512 decision to publish, or manuscript preparation. The funders had no role in the study design, data  
513 collection and analysis, decision to publish or preparation of the manuscript.

#### 514 Acknowledgment:

515 We are grateful to the study participants. In addition, our appreciation goes to the health officials  
516 from central to community level, health, and agriculture extension workers for facilitating the  
517 implementation of the study. Finally, we would like to thank our data collectors and supervisors  
518 for their support.

#### 519 Conflict of interest

520 The authors declare that there are no conflicts of interest regarding the publication of this paper.

521



## 522 References

- 523 1. Girard AW, Self JL, McAuliffe C, Olude O. The effects of household food production strategies  
524 on the health and nutrition outcomes of women and young children: a systematic review. *Paediatric*  
525 *and perinatal epidemiology*. 2012;26 Suppl 1:205-22. Epub 2012/07/07. doi: 10.1111/j.1365-  
526 3016.2012.01282.x. PubMed PMID: 22742612.
- 527 2. United Nations Children’s Fund (UNICEF), World Health Organization, International Bank for  
528 Reconstruction and Development/The World Bank. Levels and trends in child malnutrition: key findings  
529 of the 2021 edition of the joint child malnutrition estimates. Geneva: World Health Organization, 2021.
- 530 3. Stewart CP, Iannotti L, Dewey KG, Michaelsen KF, Onyango AW. Contextualising  
531 complementary feeding in a broader framework for stunting prevention. *Maternal & child nutrition*.  
532 2013;9 Suppl 2:27-45. doi: 10.1111/mcn.12088. PubMed PMID: 24074316.
- 533 4. King SE, Sawadogo-Lewis T, Black RE, Roberton T. Making the health system work for the  
534 delivery of nutrition interventions. *Maternal & child nutrition*. 2021;17(1):e13056. Epub 2020/07/22.  
535 doi: 10.1111/mcn.13056. PubMed PMID: 32691489; PubMed Central PMCID: PMC7729521.
- 536 5. Ouedraogo O, Doudou MH, Drabo KM, Kiburente M, Cisse D, Mesenge C, et al. Facilitating  
537 factors and challenges of the implementation of multisectoral nutrition programmes at the community  
538 level to improve optimal infant and young child feeding practices: a qualitative study in Burkina Faso.  
539 *Public Health Nutr*. 2020;1-12. Epub 2020/10/01. doi: 10.1017/S136898002000347X. PubMed PMID:  
540 32993837.
- 541 6. Reinhardt K, Fanzo J. Addressing Chronic Malnutrition through Multi-Sectoral, Sustainable  
542 Approaches: A Review of the Causes and Consequences. *Front Nutr*. 2014;1:13. Epub 2014/01/01. doi:  
543 10.3389/fnut.2014.00013. PubMed PMID: 25988116; PubMed Central PMCID: PMC4428483.
- 544 7. Isabel Madzorera LJ, Robert Paarlberg, Anna Herforth, Sabri Bromage, Shibani Ghosh, Samuel  
545 S Myers, William A Masters, and Wafaie W Fawzi,. Food Systems as Drivers of Optimal Nutrition and  
546 Health: Complexities and Opportunities for Research and Implementation. CURRENT DEVELOPMENTS  
547 IN NUTRITION. 2021.
- 548 8. Black RE, Victora CG, Walker SP, Bhutta ZA, Christian P, de Onis M, et al. Maternal and child  
549 undernutrition and overweight in low-income and middle-income countries. *The Lancet*.  
550 2013;382(9890):427-51. doi: 10.1016/s0140-6736(13)60937-x.
- 551 9. Namugumya BS, Candel JLL, Talsma EF, Termeer C, Harris J. Integrating Nutrition Actions in  
552 Service Delivery: The Practices of Frontline Workers in Uganda. *International journal of health policy*  
553 *and management*. 2022. Epub 2022/05/02. doi: 10.34172/ijhpm.2022.5898. PubMed PMID:  
554 35490257.
- 555 10. Gillespie S, Haddad L, Mannar V, Menon P, Nisbett N. The politics of reducing malnutrition:  
556 building commitment and accelerating progress. *The Lancet*. 2013;382(9891):552-69. doi:  
557 10.1016/s0140-6736(13)60842-9.
- 558 11. Central Statistical Agency and ICF. Ethiopia Demographic and Health Survey 2016. Addis Ababa,  
559 Ethiopia, and Rockville, Maryland, USA: CSA and ICF, 2016.
- 560 12. Kennedy E, Tessema M, Hailu T, Zerfu D, Belay A, Ayana G, et al. Multisector Nutrition Program  
561 Governance and Implementation in Ethiopia: Opportunities and Challenges. *Food Nutr Bull*.  
562 2015;36(4):534-48. Epub 2015/11/05. doi: 10.1177/0379572115611768. PubMed PMID: 26531747.
- 563 13. Kadiyala S, Morgan EH, Cyriac S, Margolies A, Roopnaraine T. Adapting Agriculture Platforms  
564 for Nutrition: A Case Study of a Participatory, Video-Based Agricultural Extension Platform in India.  
565 *PLoS One*. 2016;11(10):e0164002. Epub 2016/10/14. doi: 10.1371/journal.pone.0164002. PubMed  
566 PMID: 27736897; PubMed Central PMCID: PMC5063370.
- 567 14. Pelletier D, Gervais S, Hafeez-ur-Rehman H, Sanou D, Tumwine J. Boundary-spanning actors in  
568 complex adaptive governance systems: The case of multisectoral nutrition. 2017.
- 569 15. Bach A, Gregor E, Sridhar S, Fekadu H, Fawzi W. Multisectoral Integration of Nutrition, Health,  
570 and Agriculture: Implementation Lessons From Ethiopia. *Food and nutrition bulletin*. 2020;41(2):275-  
571 92. Epub 2020/03/14. doi: 10.1177/0379572119895097. PubMed PMID: 32166964.

- 572 16. Mersha GA, Hailu T, Kuche D, Abera A, Eshetu S, Petros A, et al. Linkages between health and  
573 agriculture sectors in Ethiopia: a formative research study exploring barriers, facilitators and  
574 opportunities for local level coordination to deliver nutritional programmes and services. *BMC*  
575 *Nutrition*. 2017;3(1). doi: 10.1186/s40795-017-0189-4.
- 576 17. Moss C, Bekele TH, Salasibew MM, Sturgess J, Ayana G, Kuche D, et al. Sustainable  
577 Undernutrition Reduction in Ethiopia (SURE) evaluation study: a protocol to evaluate impact, process  
578 and context of a large-scale integrated health and agriculture programme to improve complementary  
579 feeding in Ethiopia. *BMJ open*. 2018;8(7):e022028. Epub 2018/07/22. doi: 10.1136/bmjopen-2018-  
580 022028. PubMed PMID: 30030320; PubMed Central PMCID: PMC6059290.
- 581 18. Nicola K Gale, Gemma Heath, Elaine Cameron, Rashid S, Redwood S. Using the framework  
582 method for the analysis of qualitative data in multi-disciplinary health research. *BMC medical research*  
583 *methodology*. 2013.
- 584 19. Mohamed AA. Food Security Situation in Ethiopia: A Review Study *International Journal of*  
585 *Health Economics and Policy*. 2017;2(3):86-96. doi: 10.11648/j.hep.20170203.11.
- 586 20. Hoddinott J, Kinsey B. Child Growth in the Time of Drought. *Oxford Bulletin of Economics and*  
587 *Statistics*. 2001;63(4):409-36. doi: 10.1111/1468-0084.t01-1-00227.
- 588 21. Salasibew MM, Moss C, Ayana G, Kuche D, Eshetu S, Dangour AD. The fidelity and dose of  
589 message delivery on infant and young child feeding practice and nutrition sensitive agriculture in  
590 Ethiopia: a qualitative study from the Sustainable Undernutrition Reduction in Ethiopia (SURE)  
591 programme. *J Health Popul Nutr*. 2019;38(1):29. Epub 2019/10/23. doi: 10.1186/s41043-019-0187-z.  
592 PubMed PMID: 31639070; PubMed Central PMCID: PMC6805331.
- 593 22. Abdullahi LH, Rithaa GK, Muthomi B, Kyallo F, Ngina C, Hassan MA, et al. Best practices and  
594 opportunities for integrating nutrition specific into nutrition sensitive interventions in fragile contexts:  
595 a systematic review. *BMC nutrition*. 2021;7(1):46. Epub 2021/07/30. doi: 10.1186/s40795-021-00443-  
596 1. PubMed PMID: 34321101; PubMed Central PMCID: PMC68320180.

598 [List of figures](#)

599 **Figure 1:** Sustaining the integration of agriculture and health sectors for reduction of  
600 undernutrition in Ethiopia

601

602 [Supporting information](#)

603 **S1 File. Interview guide**

604 **S2 File. COREQ (Consolidated criteria for REporting Qualitative research) Checklist**

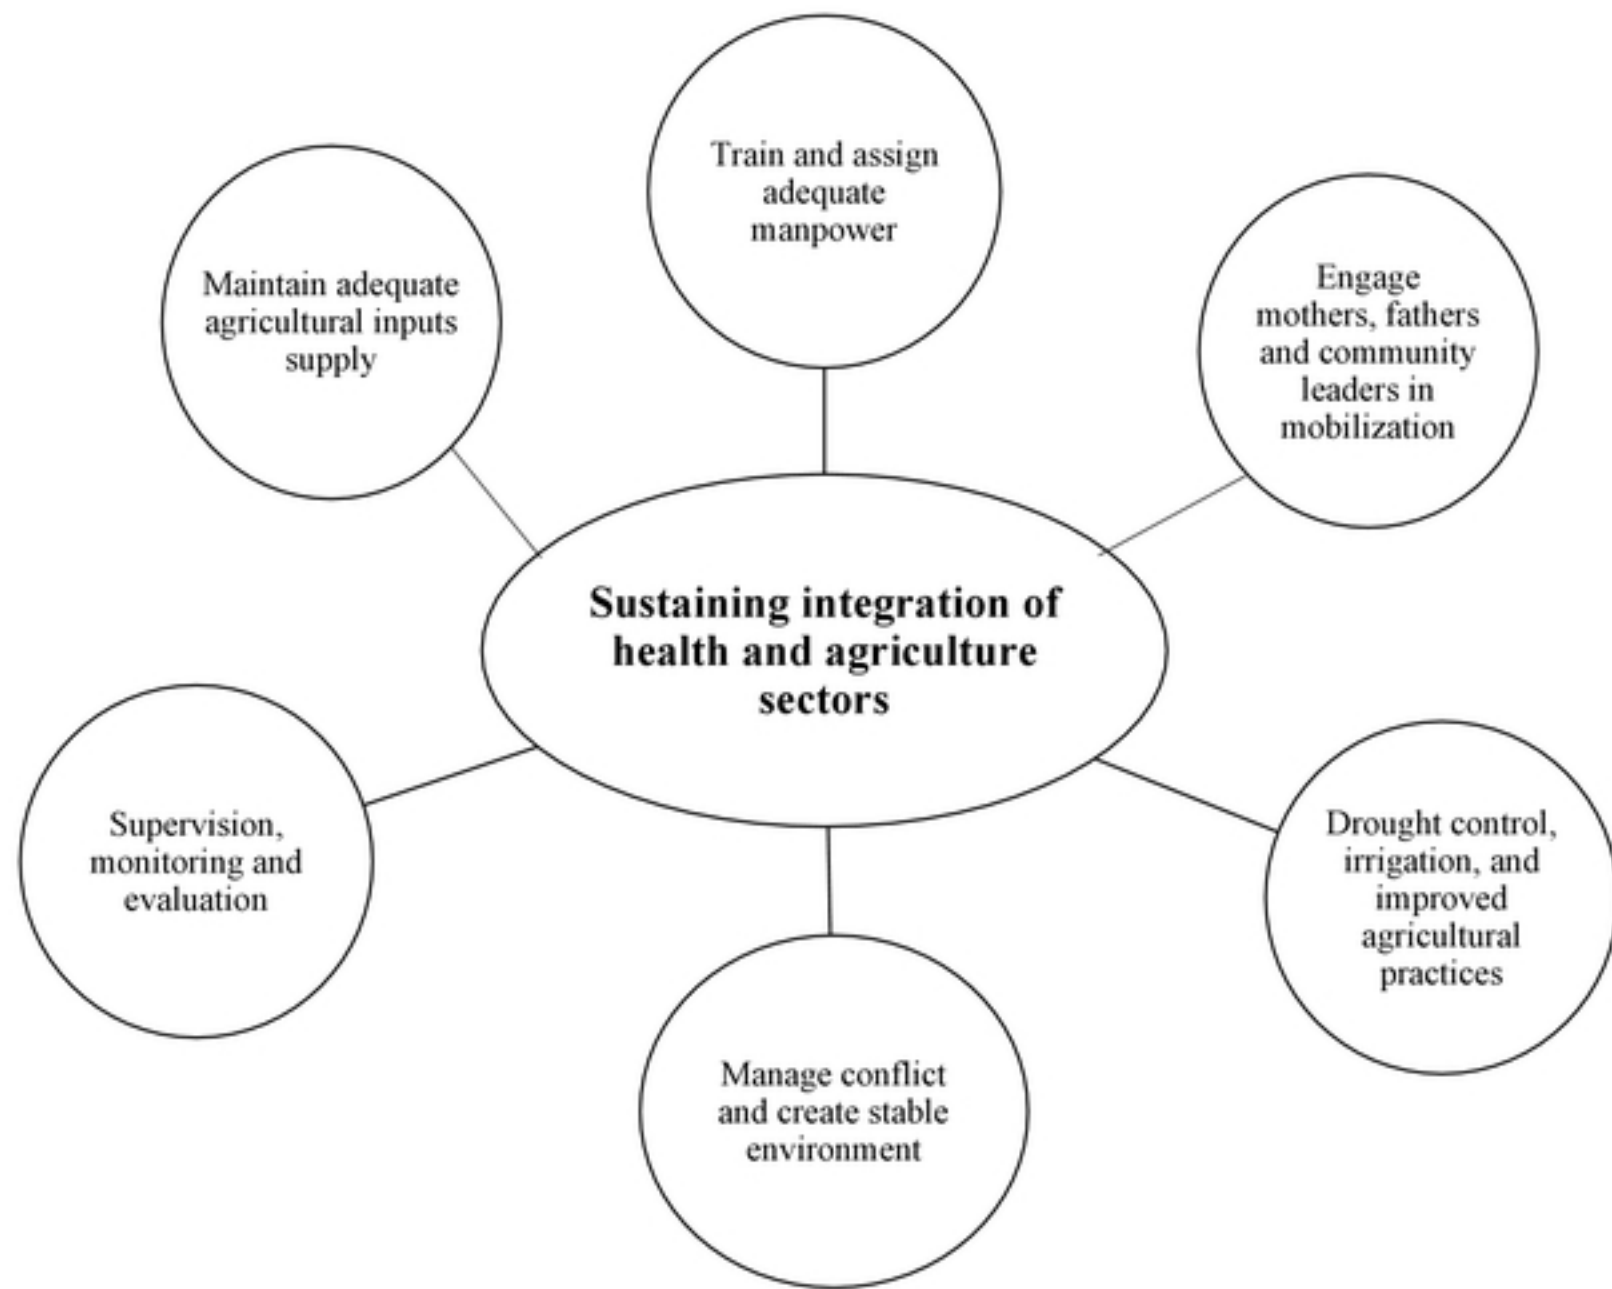

Figure
